# Supplementary material for: Technical note: Reanalysis of Aura MLS Chemical Observations
Source: Copernicus journal article supplement (doi:10.5194/acp-2019-530), 2019-06-26
Supplement: Supplementary file 1 [file acp-2019-530-supplement.pdf]

# Supplement to “Technical Note: Reanalysis of Aura MLS Chemical Observations”

Quentin Errera<sup>1</sup>, Simon Chabrillat<sup>1</sup>, Yves Christophe<sup>1</sup>, Jonas Debosscher<sup>1</sup>, Daan Hubert<sup>1</sup>, William Lahoz<sup>2,†</sup>, Michelle L. Santee<sup>3</sup>, Masato Shiotani<sup>4</sup>, Sergey Skachko<sup>5</sup>, Thomas von Clarmann<sup>6</sup>, and Kaley Walker<sup>7</sup>

<sup>1</sup>Royal Belgian Institute for Space Aeronomy (BIRA-IASB), Brussels, Belgium

<sup>2</sup>Norsk Institutt for Luftforskning, NILU, Norway

<sup>3</sup>Jet Propulsion Laboratory, California Institute of Technology, USA

<sup>4</sup>Research Institute for Sustainable Humanosphere, Kyoto University, Japan

<sup>5</sup>Environment and Climate Change Canada

<sup>6</sup>Karlsruhe Institute of Technology, Institute of Meteorology and Climate Research, Germany

<sup>7</sup>Department of Physics, University of Toronto, Canada

<sup>†</sup>Deceased, 1 April 2019

**Correspondence:** Quentin Errera (quentin.errera@aeronomie.be)

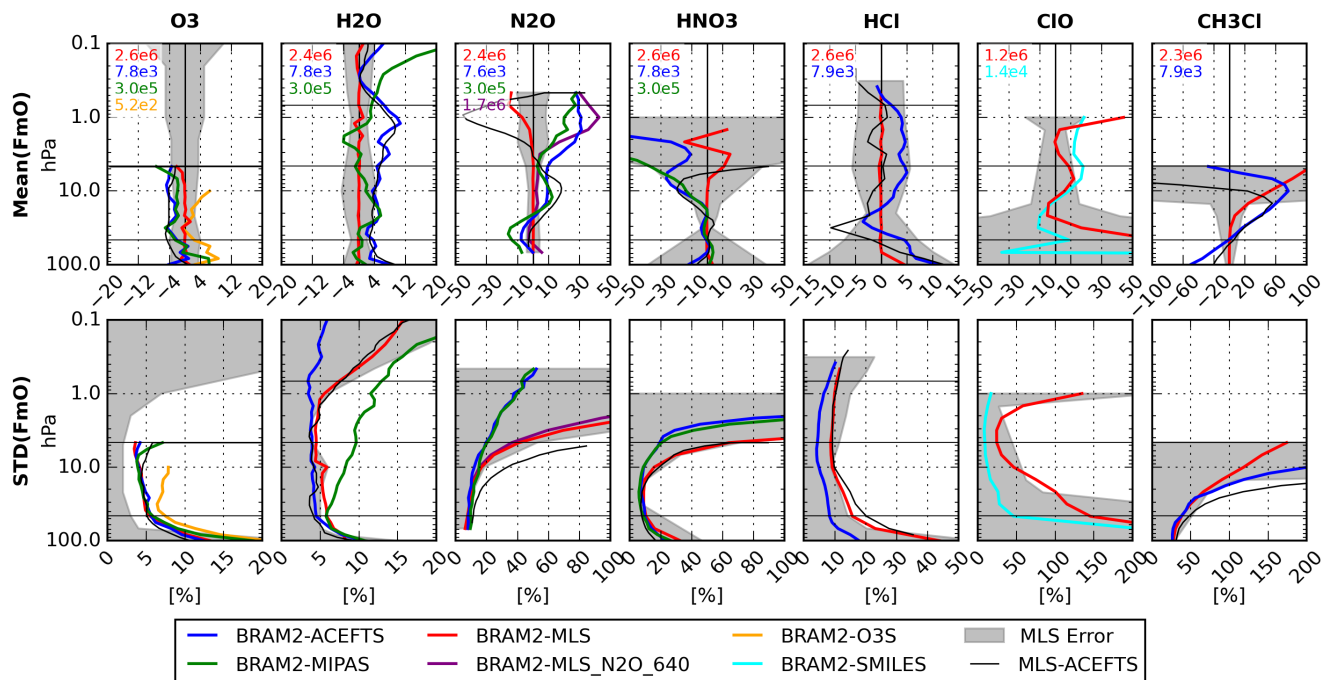

Figure S1. As Fig. 5 but between 60°S-30°S.

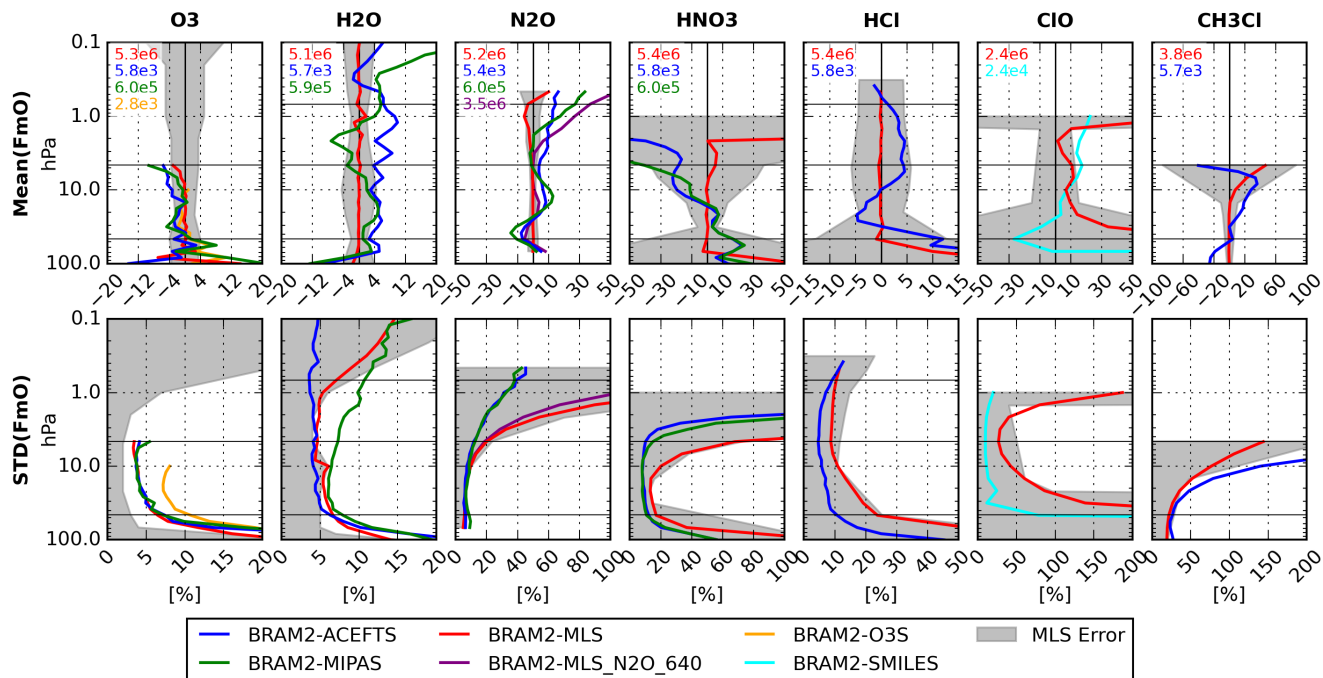

Figure S2. As Fig. 5 but between 30°S-30°N.

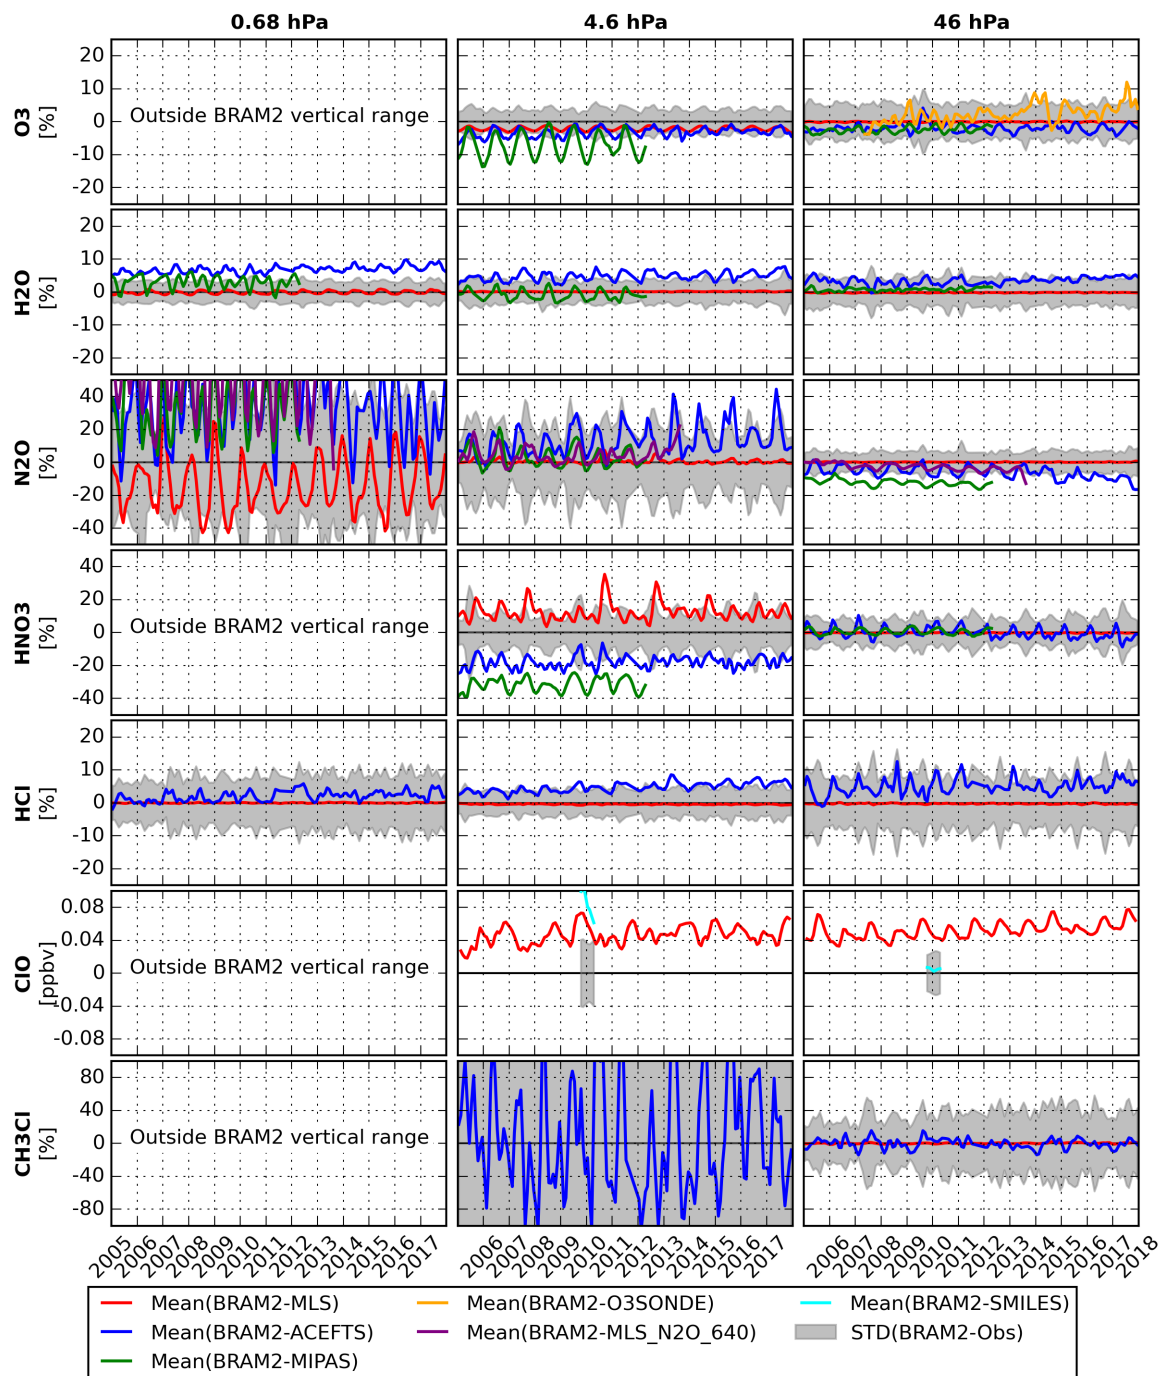

**Figure S3.** As Fig. 6 but between 60°S-30°S.

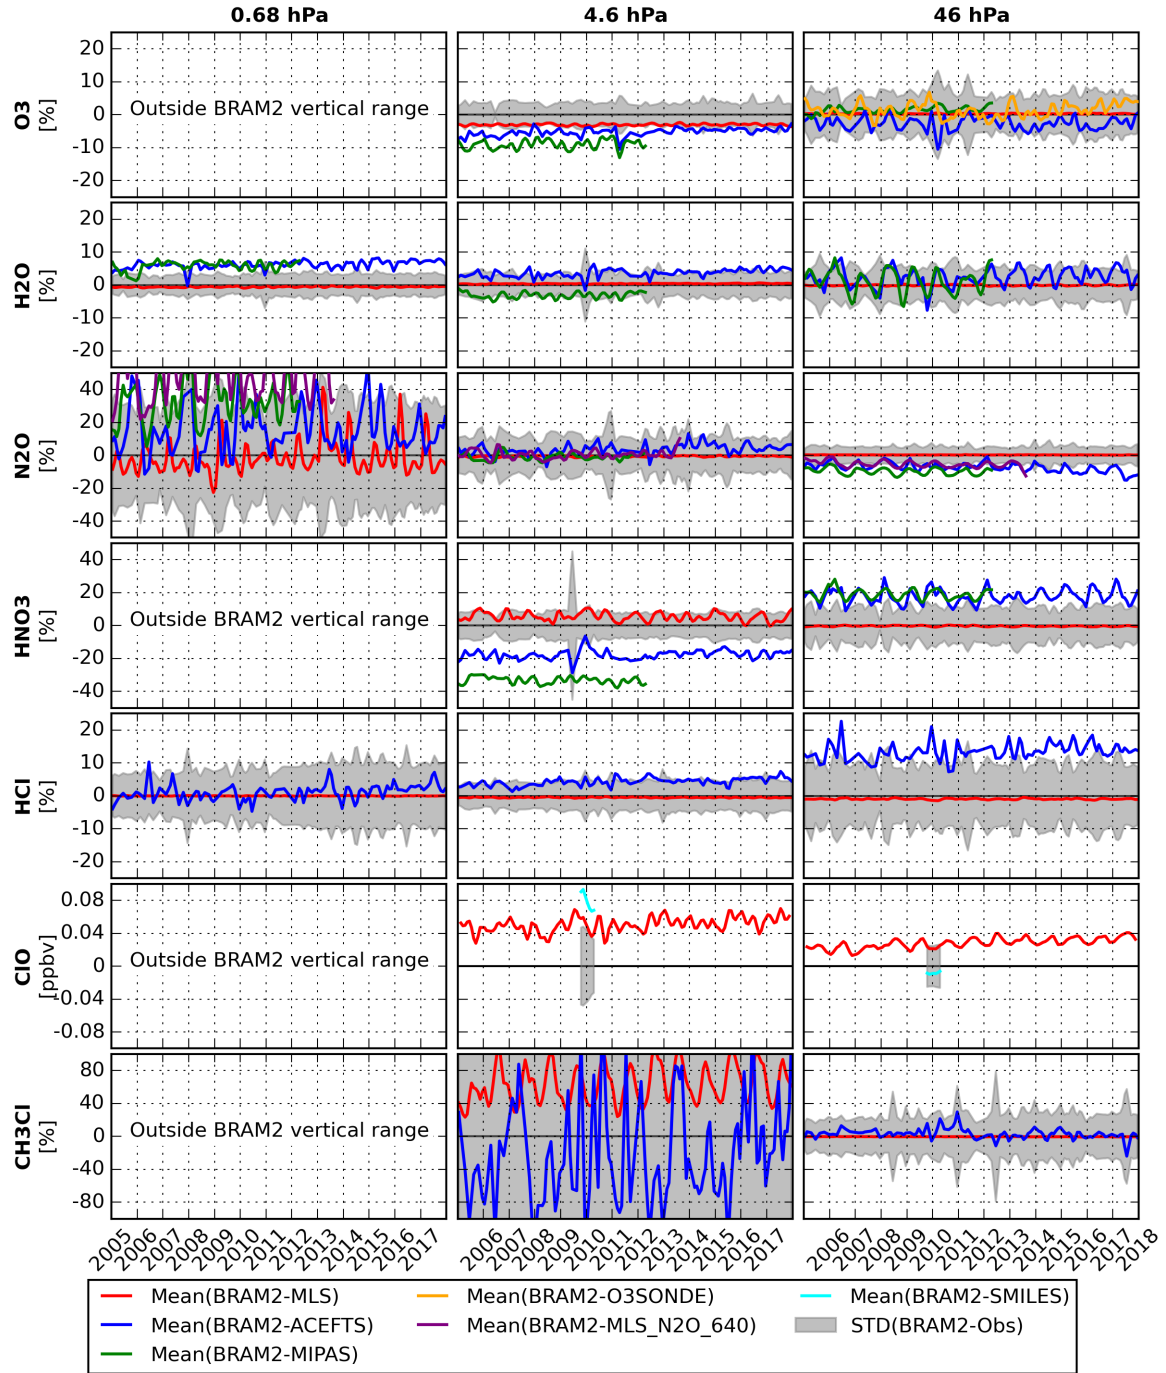

**Figure S4.** As Fig. 6 but between 30°S-30°N.

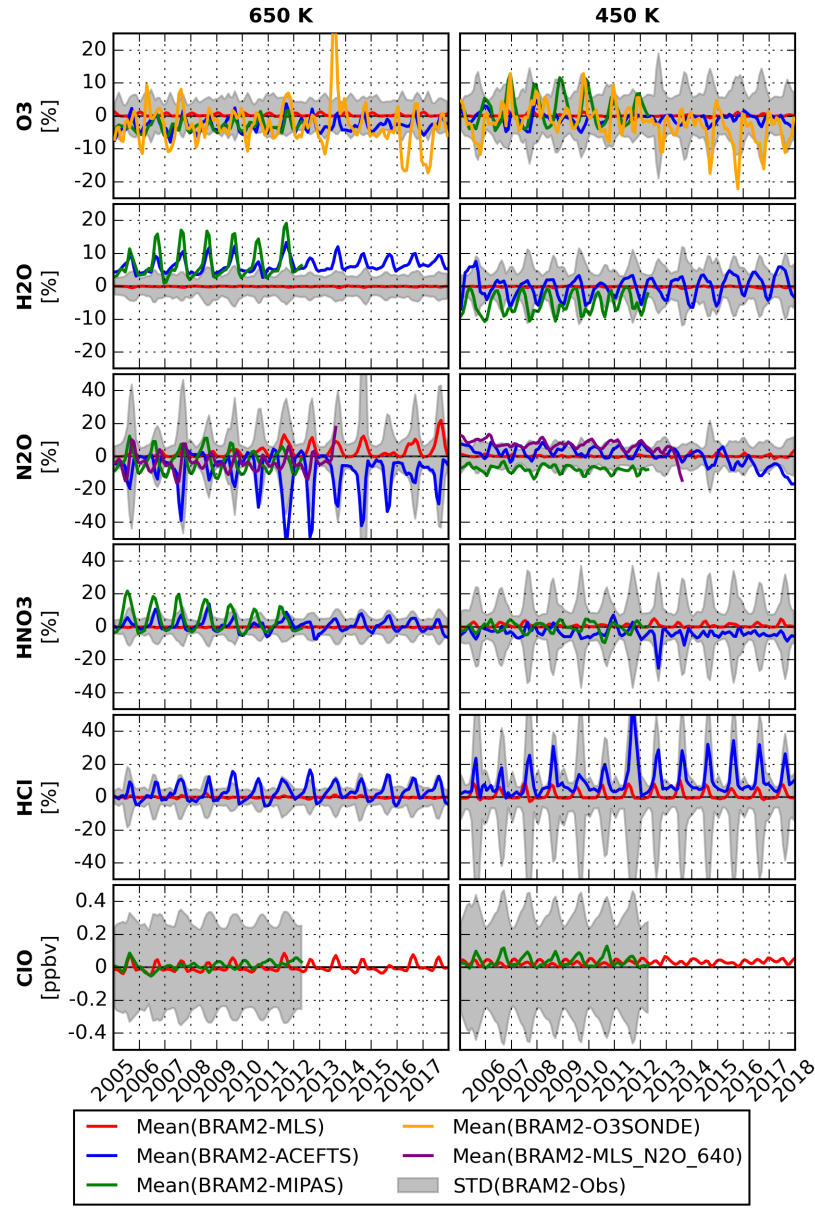

**Figure S5.** As Fig. 8 but in the outer Antarctic polar vortex between (75°S-60°S of equivalent latitude).

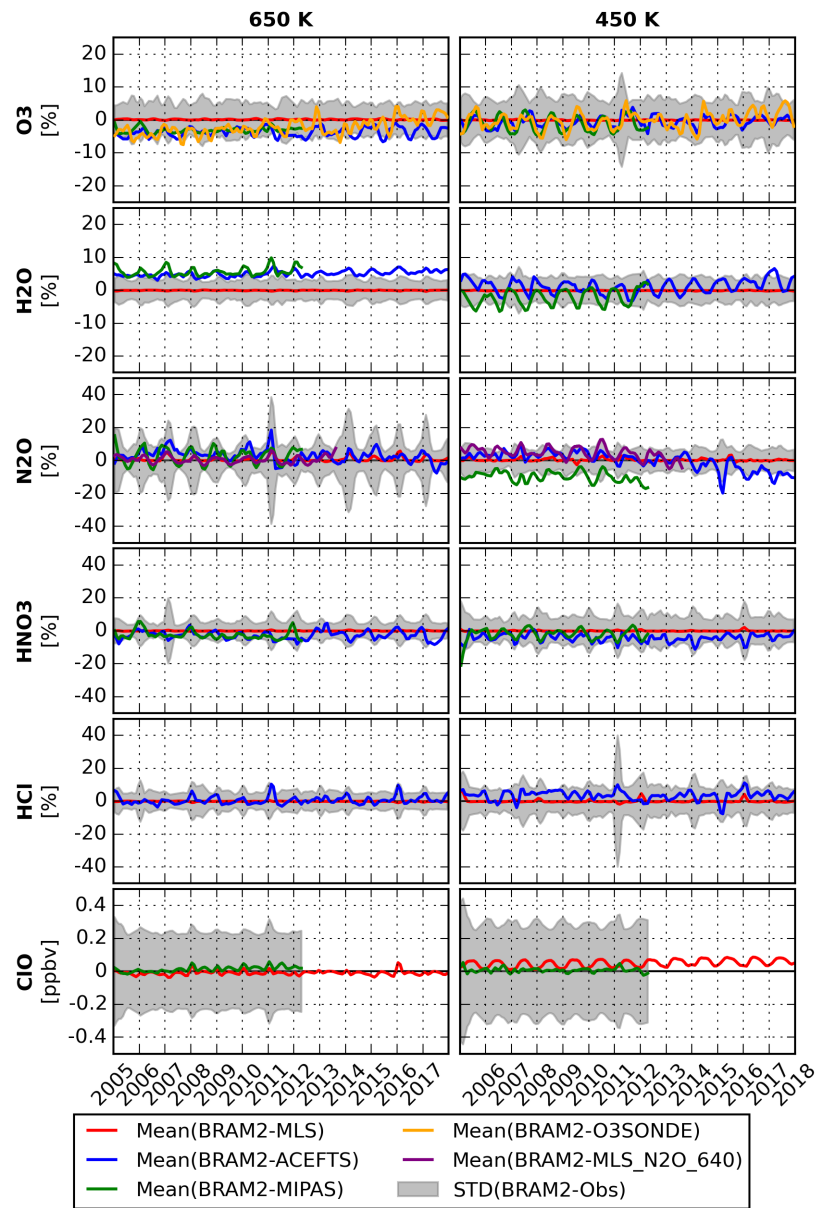

**Figure S6.** As Fig. 8 but in the outer Arctic polar vortex between (60°N-75°N of equivalent latitude).



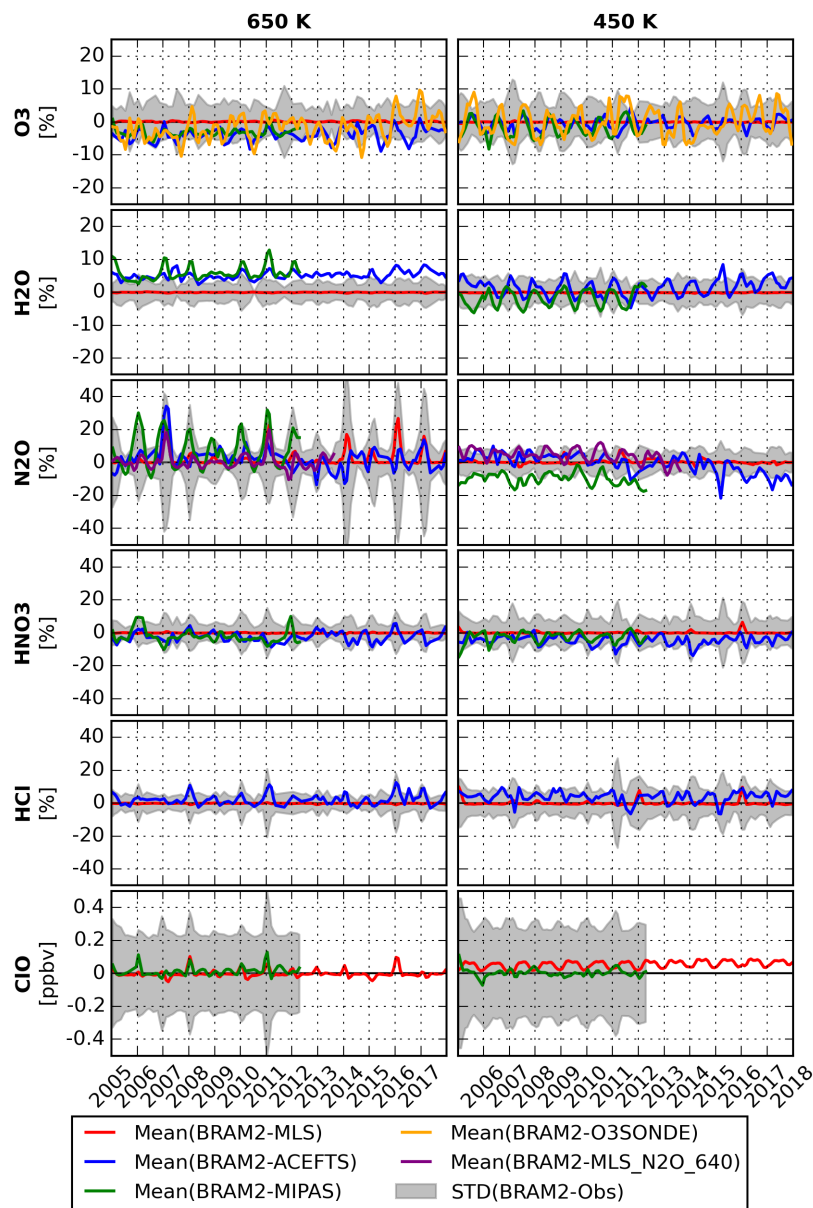

**Figure S7.** As Fig. 8 but in the outer Arctic polar vortex between (75°N-90°N of equivalent latitude).

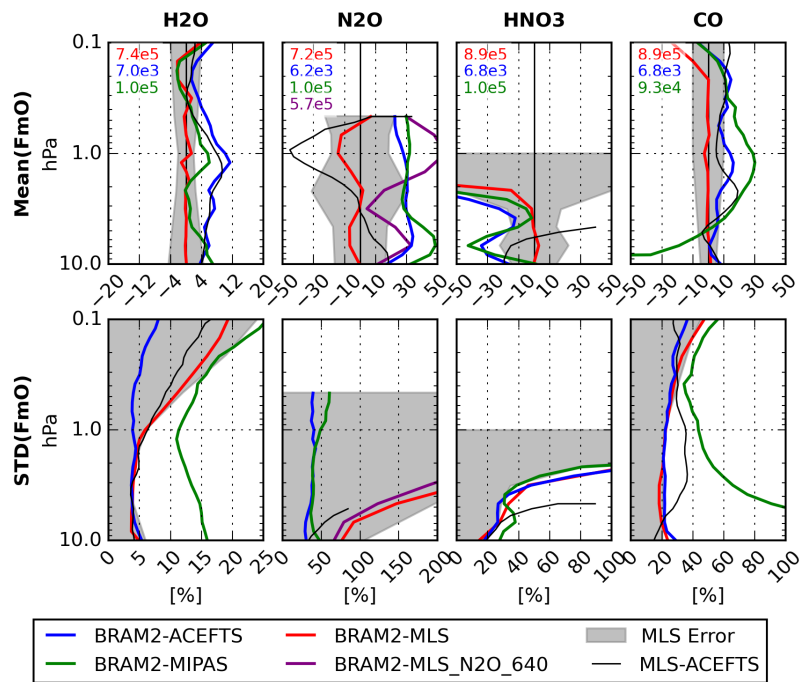

**Figure S8.** As Fig. 10 but between 90°S-60°S
